# Supplementary material for: Selective Lysosomal H2O2 – ROS Imaging with a Naphthalimide Probe Forming Hydroxylamine without Overoxidation
Source: Research Square preprint supplement (doi:10.21203/rs.3.rs-8253737/v1), 2025-12-17
Supplement: Supplementary file 1 [file 4987edd1136f182fd35a4d28.docx]

**Supplementary Information**

**Selective Lysosomal H2O2 – ROS Imaging with a Naphthalimide Probe Forming Hydroxylamine without Overoxidation**

Ricardo Flores-Cruz, Nitzya Ruiz-Robledo,[a] Adriana Romo-Pérez,[a] and Arturo Jiménez-Sánchez*[a]

*a* Instituto de Química, Universidad Nacional Autónoma de México, México D.F. No. 04510, México. * [arturo.jimenez@iquimica.unam.mx](mailto:arturo.jimenez@iquimica.unam.mx)

**Graphical Abstract**


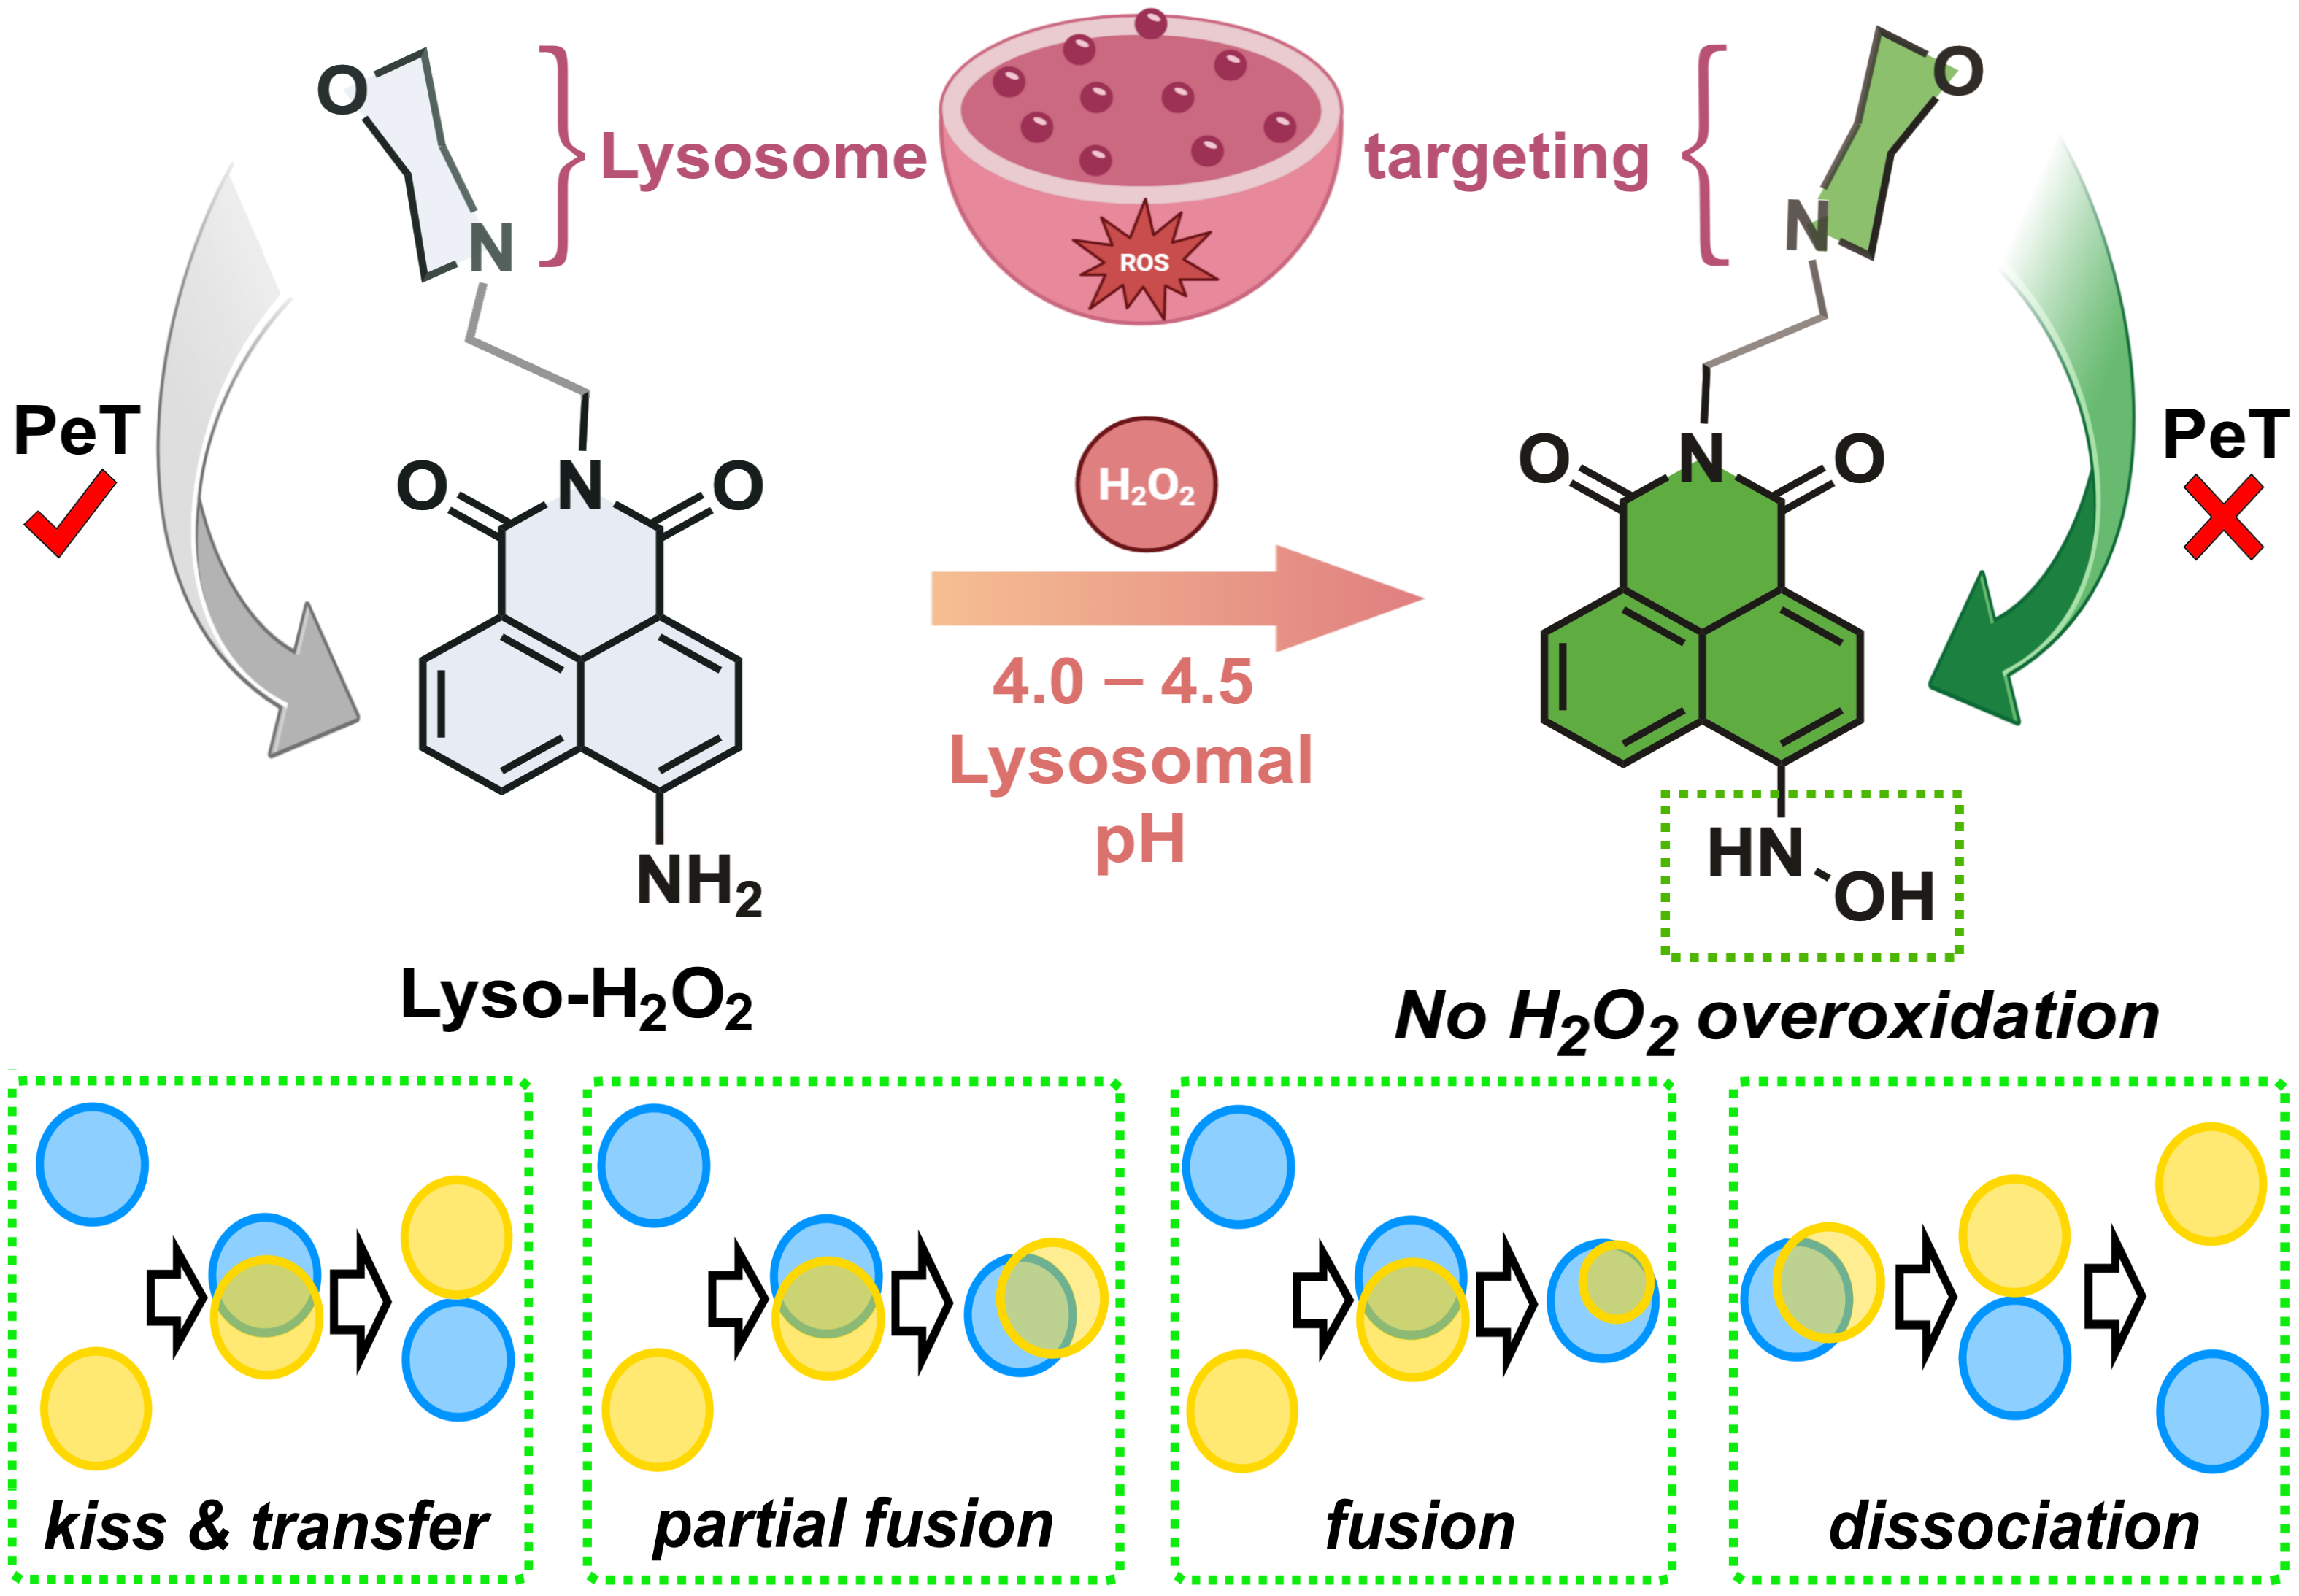


A novel lysosome-targeted fluorescent probe, **LysoH₂O₂**, enables real-time, high-fidelity imaging of hydrogen peroxide dynamics within the lysosomal compartment of living cells, offering a powerful tool for redox biology.

**METHODS**

***General Probe Synthesis***

Synthesis of 6-(2-morpholinoethyl)-1*H*-benzo[*de*]isoquinoline-1,3(2*H*)-dione (**LysoH2O2**). General Methods: All commercial reagents were used as received. NMR spectra were recorded on a 300 MHz spectrometer. Chemical shifts (δ) are reported in ppm relative to residual solvent peaks. High-resolution mass spectrometry (HRMS) was performed using electrospray ionization (ESI).

Procedure: A mixture of 4-bromo-1, 8-naphthalic anhydride, 1 mmol, 0.278 g and sodium azide NaN3 (0.195 g, 3 mmol) were dissolved in *N,N*-dimethylformamide (DMF) / H2O (v/v, 10/1, 20 mL) and stirred at 80 °C for 4 h. Then, the solvent was poured into ice water (10 ml), and the precipitated solid was filtered.Then, the solid was dissolved in DMF (20 ml), added with 2ml of aquous NaHS (0.224 g, 4 mmol) and further stirred at 90 °C for 1h. Next, the reaction solution was added with ice water and adjusted to weak acidity. Subsequently, a solid was filtered and added 10 mL DMF containing 4-(2-aminoethyl)morpholine (1.3 mmol, 0.75 mL) and heated at 120 °C under controlled pressure for 8 hours with vigorous stirring. After cooling to room temperature, the crude material was dissolved in acetone (~25 mL) and purified by flash column chromatography on silica gel (eluent: DCM/MeOH 95:5). The product was isolated as a yellow solid. Yield: 67% (0.225 g). 1H NMR (300 MHz, CDCl3) δ: 8.61 (dd, J = 26.60 Hz, 1H), 8.42 (dd, J = 12.87 Hz, 1H), 8.12 (dd, J = 21.45 Hz, 1H), 7.68 (m, J = 22.32 Hz, 1H), 6.90 (d, J = 13.73 Hz, 1H), 4.97 (s, 2H), 4.34 (t, J = 21.45 Hz, 2H), 3.71 (m, J = 21.45 Hz, 4H), 2.72 (t, J = 26.60 Hz, 2H), 2.63 (s, 4H). 13C NMR (75 MHz, CDCl3) δ 154.2, 147.1, 133.7, 129.3, 127.2, 124.8, 122.1, 119.5, 117.21, 109.4, 107.81, 67.25, 57.16, 55.18, 36.41. HRMS (ESI+) m/z: Calculated for C18H20N3O3 [M+H]+: 326.1499. Found: 326.14.


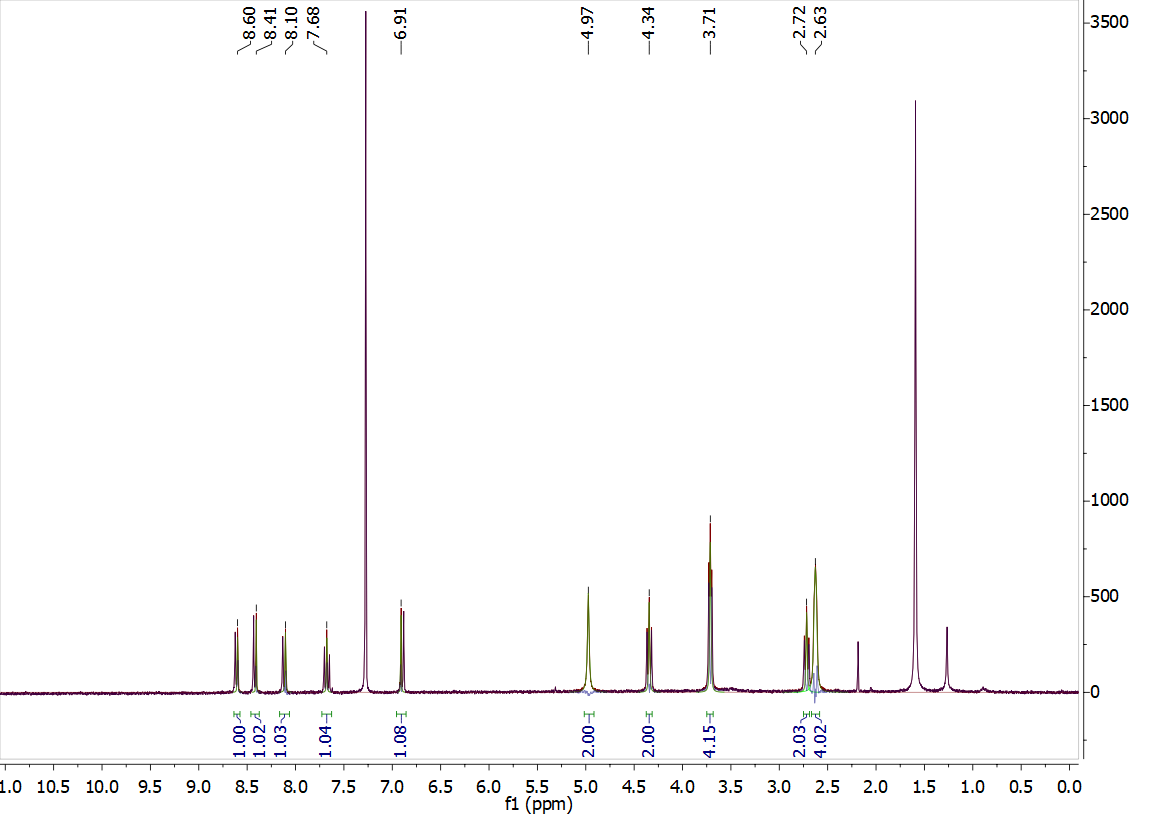


**Figure S1**. 1H NMR spectrum (300 MHz, CDCl3) of **LysoH2O2**.


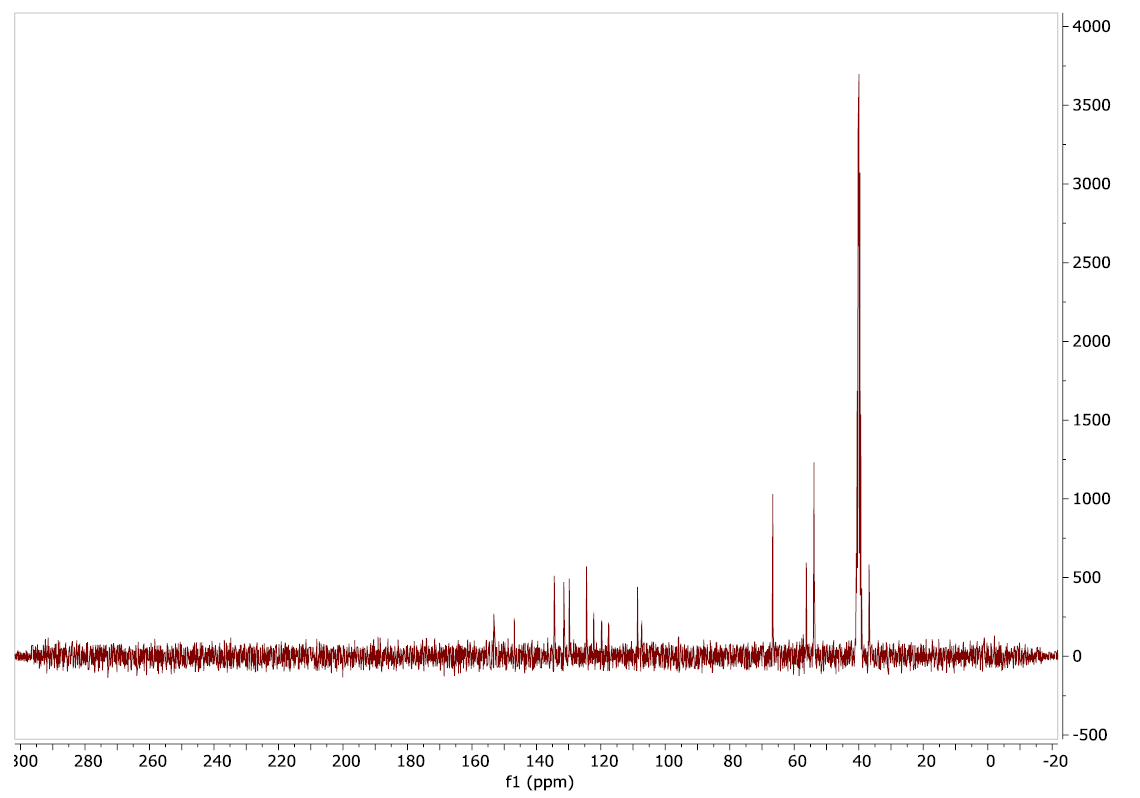


**Figure S2**. 13C NMR spectrum (75 MHz, CDCl3) of **LysoH2O2**.


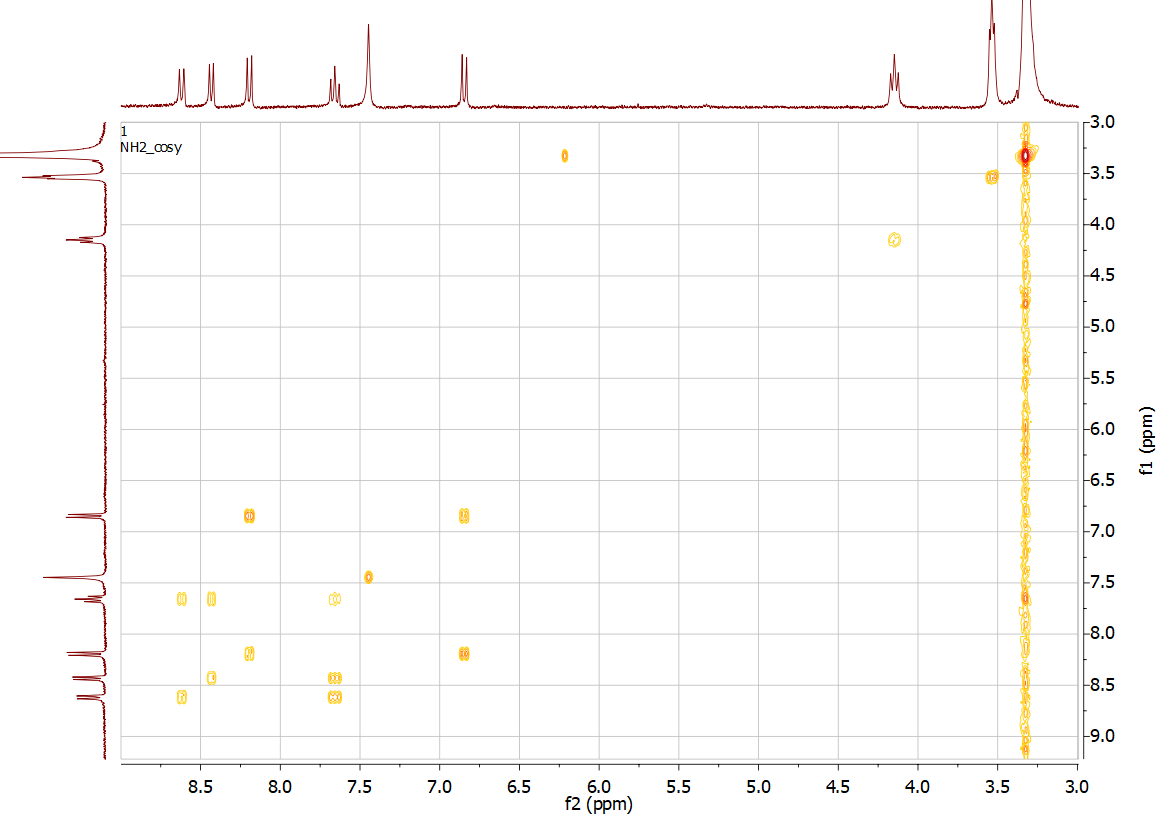


**Figure S3**. 1H-1H COSY NMR spectrum (300 MHz, CDCl3) of **LysoH2O2**.


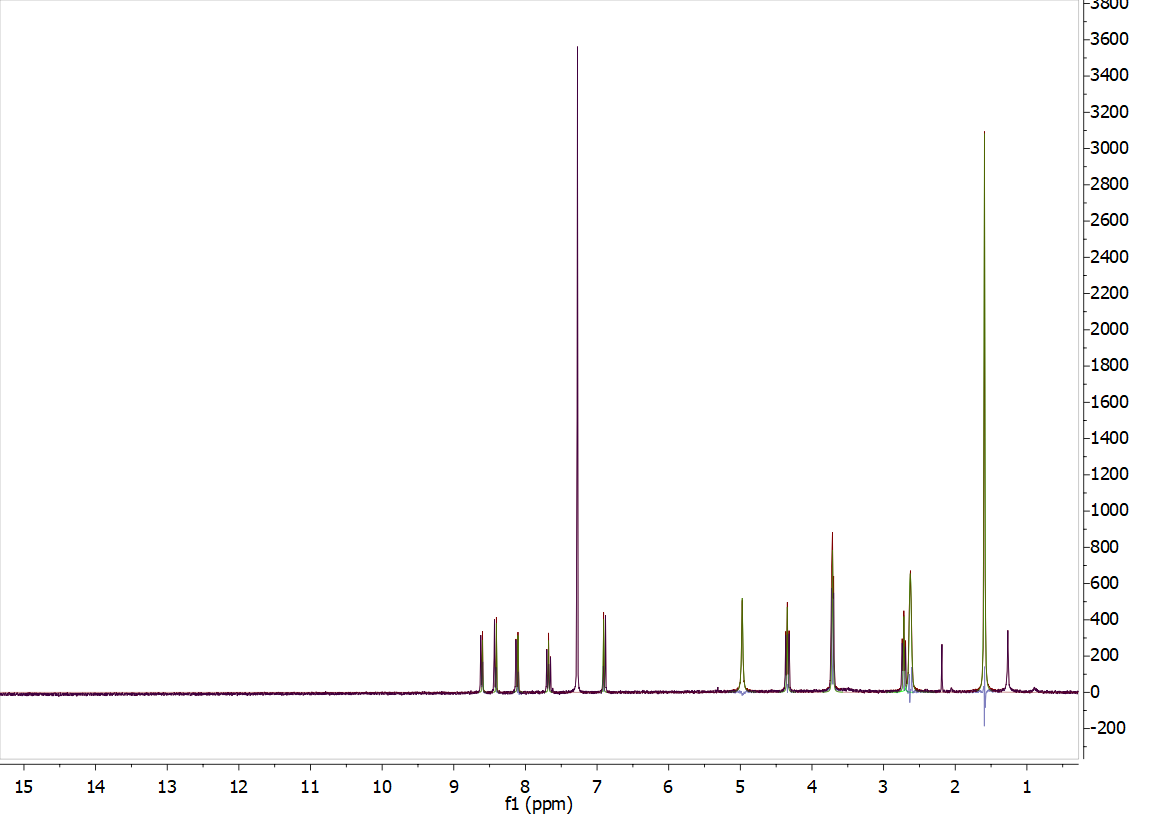


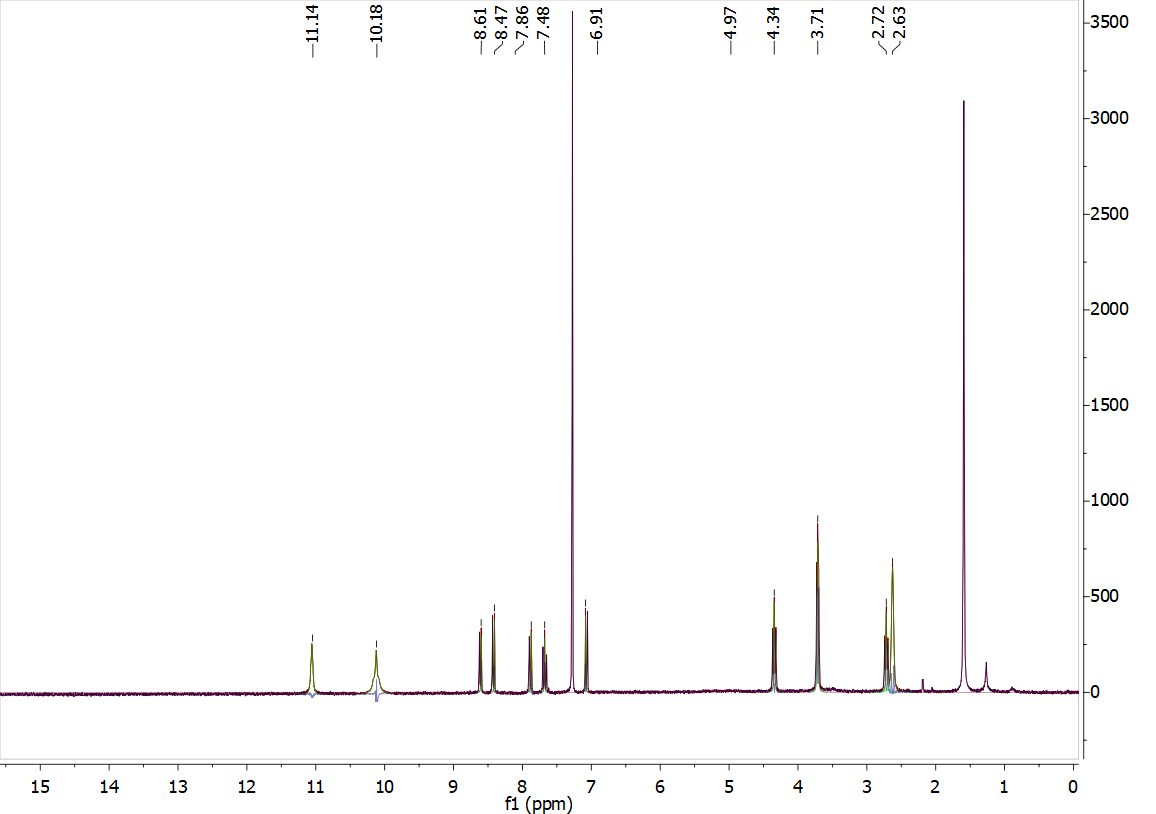


**Figure S4**. 1H-NMR spectra (300 MHz, CDCl3) of **LysoH2O2** (above) and after adding 1 equiv H2O2 14 % (below, δ: 10.15 (s, 1H, -OH signal) and 11.05 (s, 1H, -NH- signal).


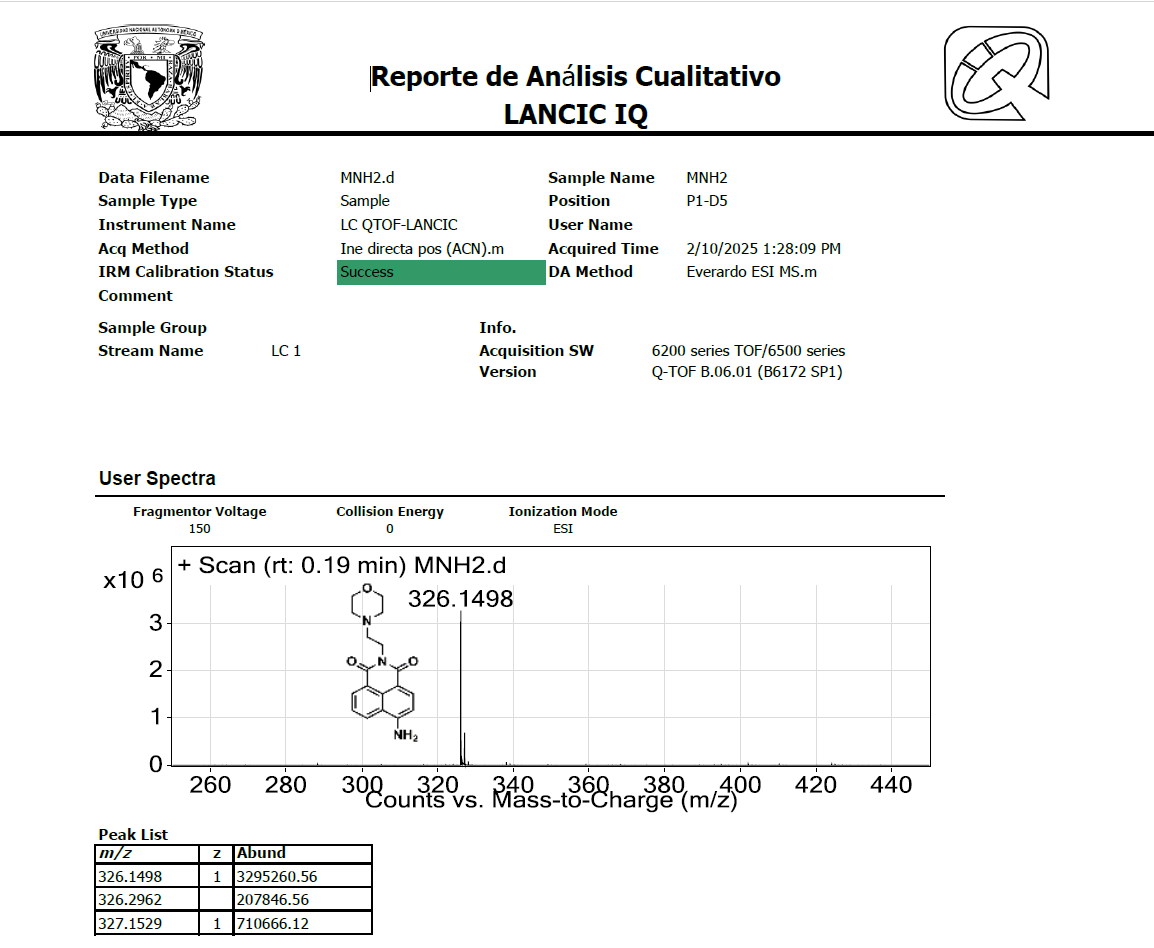


**Figure S5**. HRMS (ESI-TOF+) spectra of **LysoH2O2** (m/z: Calculated for C18H20N3O3 [M+H]+: 326.14, found: 326.1498).


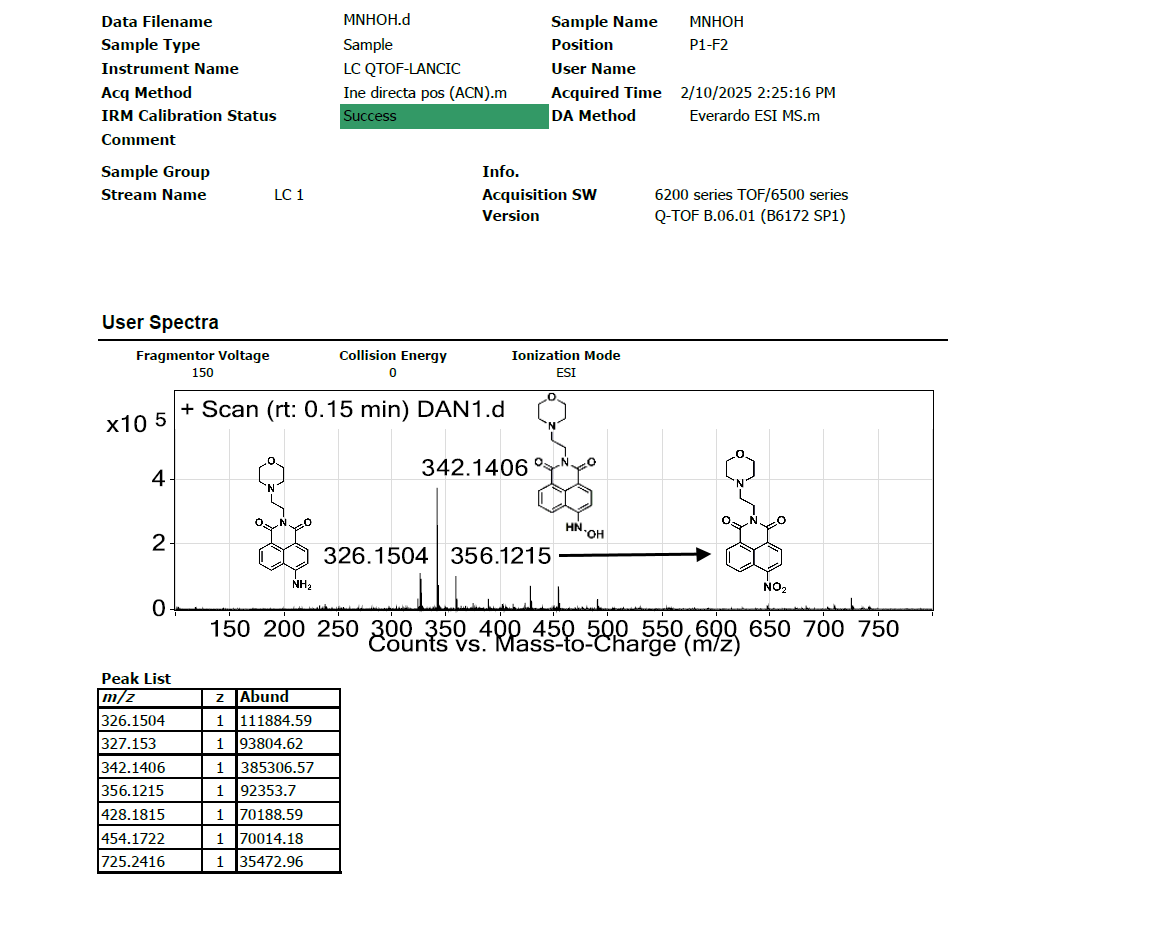


**Figure S6**. HRMS (ESI-TOF+) spectra of **LysoH2O2** after adding 1 equiv H2O2 14 % (m/z: Calculated for **hydroxylamine** derivative C18H20N3O4 [M+H]+: 342.14, found: 342.1406). Also, the **nitro-oxidized** derivative was seen, m/z: C18H18N3O5 [M+H]+: 356.12, found: 356.1215).


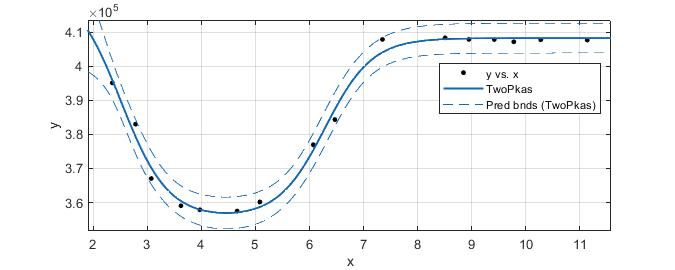


Coefficients with extrapolation (with 95% confidence bounds):

P1 = 4.083e+05 (4.063e+05, 4.102e+05)

P2 = 3.554e+05 (3.522e+05, 3.586e+05)

P3 = pKa’s = (**2.509**, **6.285**)

P4 = 4.241e+05 (3.962e+05, 4.519e+05)

Goodness of fit:

SSE: 5.641e+07

R-square: 0.9918

Adjusted R-square: 0.9888

RMSE: 2264

**Figure S7**. Acid-base profiles and p*K*a analysis for **LysoH2O2**

**Table S1. LysoH2O2** HOMO – LUMO interactions obtained at the PBE/6-31G(d,p) level of theory, showing frontier orbital distributions HOMO-1 (H-1), HOMO (H), LUMO (L), LUMO+1 (L1) and corresponding lateral views (b). Below are show selected natural bond orbital (NBO) distributions.

| H-1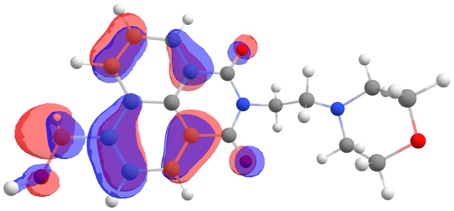 | H-1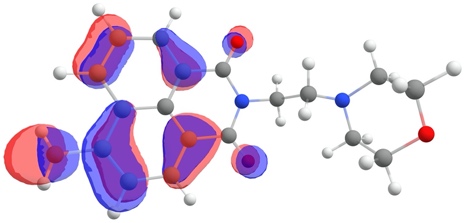 |
| --- | --- |
| H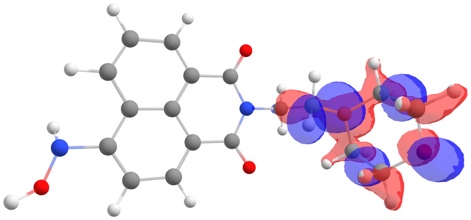 | H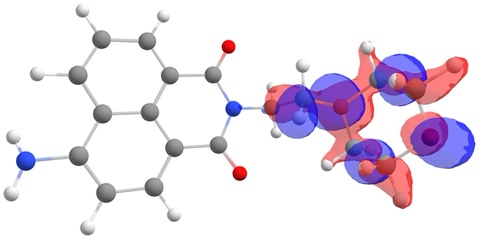 |
| L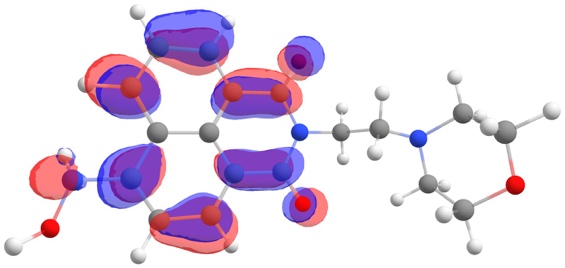 | L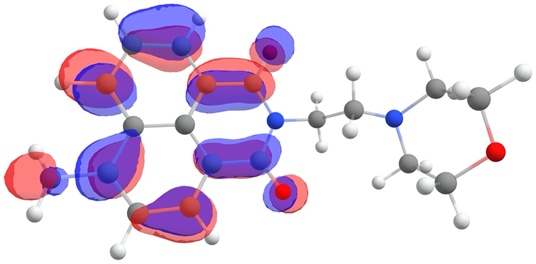 |
| L1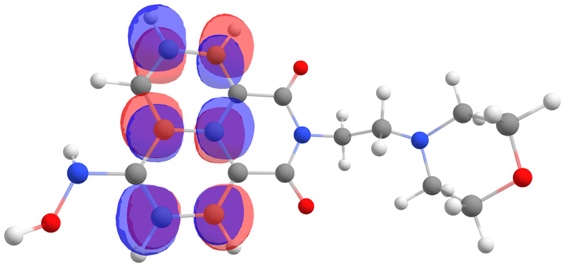 | L1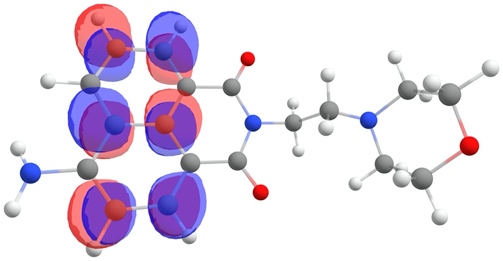 |
| H-1b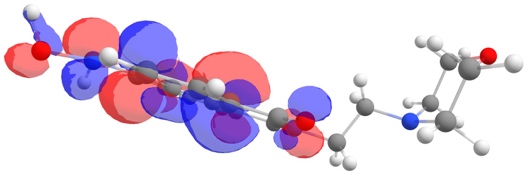 | H-1b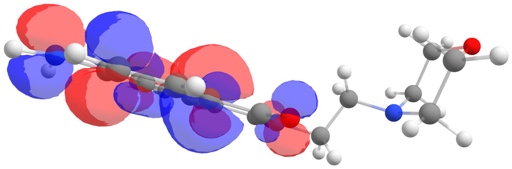 |
| Hb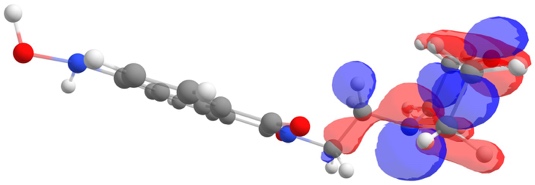 | Hb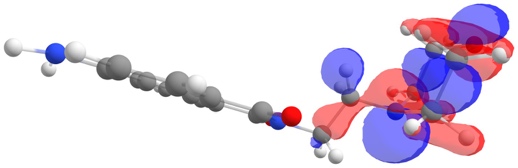 |
| Lb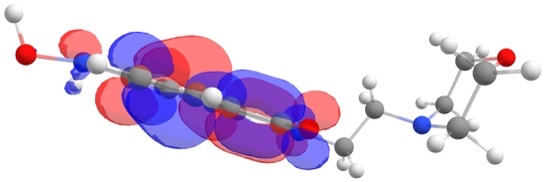 | Lb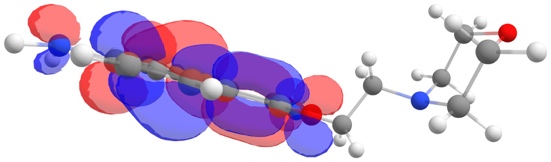 |
| L1b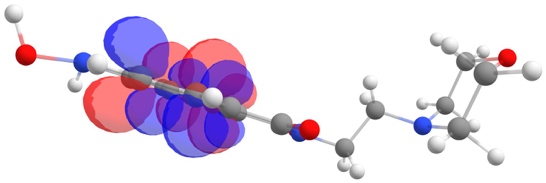 | L1b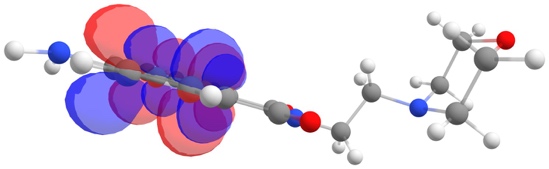 |

NBO Interactions:

| 16 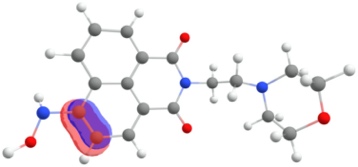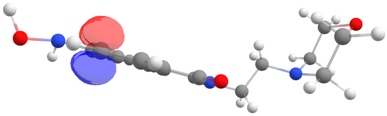 | 11 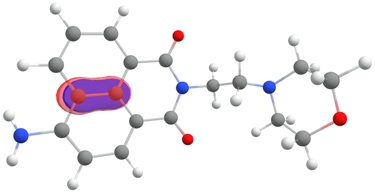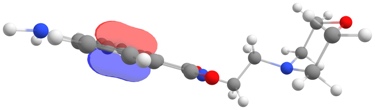 |
| --- | --- |
| 17 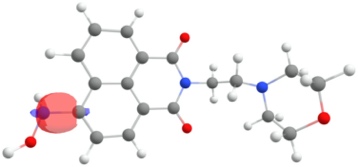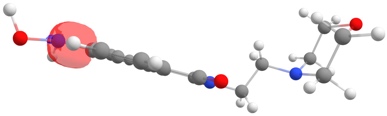 | 17 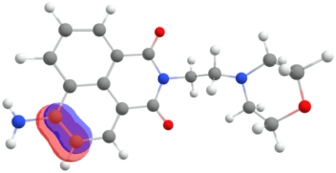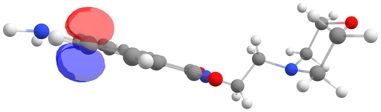 |
| 24 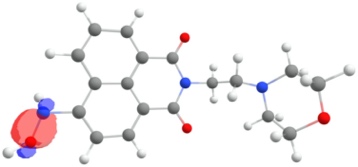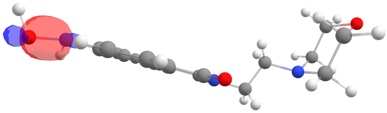 | 25 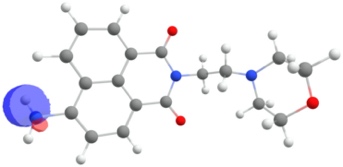 |
| 25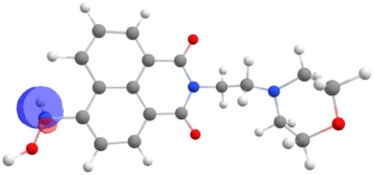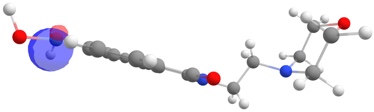 | 26 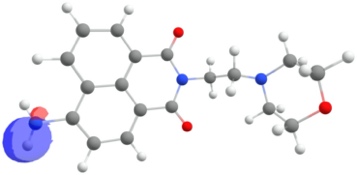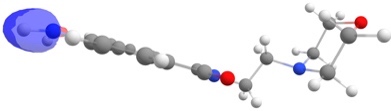 |
| 26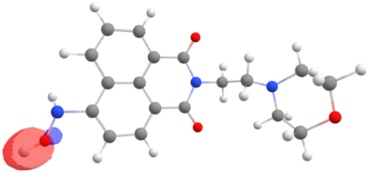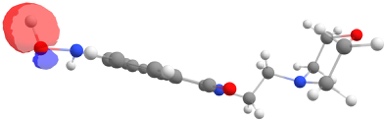 | 78 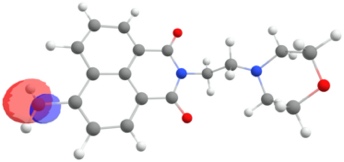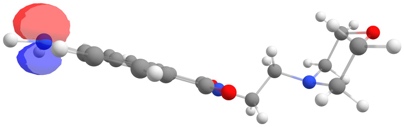 |
| 79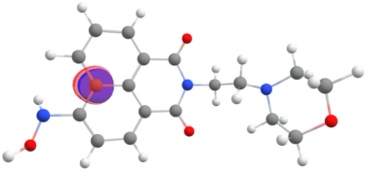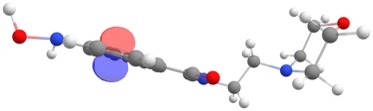 |  |
| 81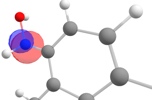 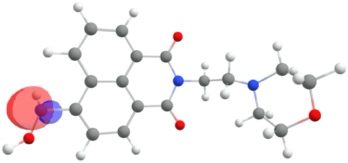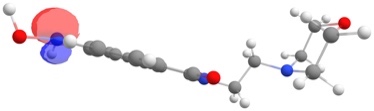 |  |
| 82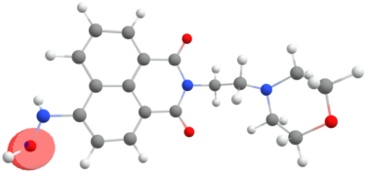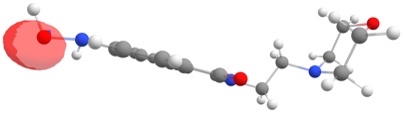 |  |
| 83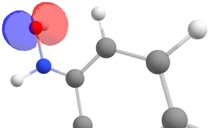 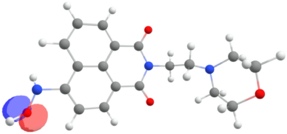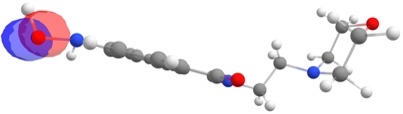 |  |
